# Supplementary material for: Distinctive High Expression of Antiretroviral APOBEC3 Protein in Mouse Germinal Center B Cells
Source: MDPI journal article supplement (doi:10.3390/v14040832), 2022-04-17
Supplement: s1 [file s1]

# FLAG

|             |                                                                       |
|-------------|-----------------------------------------------------------------------|
| E1_FLAG-mA3 | ATG <u>GACTACAAAGACGATGACGACAAG</u> GGACCATTCTGTCTGGGATGCAGCCATCGCAAA |
| isoform_2   | -----ATGGGACCATTCTGTCTGGGATGCAGCCATCGCAAA                             |
| isoform_1   | -----ATGGGACCATTCTGTCTGGGATGCAGCCATCGCAAA                             |
|             | * : *****                                                             |
| E1_FLAG-mA3 | TGCTATTACCGATCAGAAACCTGATATCTCAAGAAACATTCAAGTTCCACTTTAAGAAC           |
| isoform_2   | TGCTATTACCGATCAGAAACCTGATATCTCAAGAAACATTCAAGTTCCACTTTAAGAAC           |
| isoform_1   | TGCTATTACCGATCAGAAACCTGATATCTCAAGAAACATTCAAGTTCCACTTTAAGAAC           |
|             | *****                                                                 |
| E1_FLAG-mA3 | CTAGGCTATGCCAAAGGCCGAAAGATACCTTCTTGTGCTATGAAGTGACTAGAAAGGAC           |
| isoform_2   | CTAGGCTATGCCAAAGGCCGAAAGATACCTTCTTGTGCTATGAAGTGACTAGAAAGGAC           |
| isoform_1   | CTAGGCTATGCCAAAGGCCGAAAGATACCTTCTTGTGCTATGAAGTGACTAGAAAGGAC           |
|             | *****                                                                 |
| E1_FLAG-mA3 | TGCGATTACCCGTCTCCCTTCACCATGGGGTCTTTAAGAACAAGGACAACATCCACGCT           |
| isoform_2   | TGCGATTACCCGTCTCCCTTCACCATGGGGTCTTTAAGAACAAGGACAACATCCACGCT           |
| isoform_1   | TGCGATTACCCGTCTCCCTTCACCATGGGGTCTTTAAGAACAAGGACAACATCCACGCT           |
|             | *****                                                                 |
| E1_FLAG-mA3 | GAAATCTGCTTTTTTATACTGGTTCCATGACAAAGTACTGAAAGTGCTGTCTCCGAGAGAA         |
| isoform_2   | GAAATCTGCTTTTTTATACTGGTTCCATGACAAAGTACTGAAAGTGCTGTCTCCGAGAGAA         |
| isoform_1   | GAAATCTGCTTTTTTATACTGGTTCCATGACAAAGTACTGAAAGTGCTGTCTCCGAGAGAA         |
|             | *****                                                                 |
| E1_FLAG-mA3 | GAGTTCAAGATCACCTGGTATATGTCCTGGAGCCCCTGTTTCGAATGTGCAGAGCAGATA          |
| isoform_2   | GAGTTCAAGATCACCTGGTATATGTCCTGGAGCCCCTGTTTCGAATGTGCAGAGCAGATA          |
| isoform_1   | GAGTTCAAGATCACCTGGTATATGTCCTGGAGCCCCTGTTTCGAATGTGCAGAGCAGATA          |
|             | *****                                                                 |
| E1_FLAG-mA3 | GTAAGGTTCTGGCTACACACCACAACCTGAGCCTGGACATCTTCAGTCCCCGCTCTAC            |
| isoform_2   | GTAAGGTTCTGGCTACACACCACAACCTGAGCCTGGACATCTTCAGTCCCCGCTCTAC            |
| isoform_1   | GTAAGGTTCTGGCTACACACCACAACCTGAGCCTGGACATCTTCAGTCCCCGCTCTAC            |
|             | *****                                                                 |
| E1_FLAG-mA3 | AACGTACAGGACCCAGAAACCCAGCAGAATCTTTGCAGGCTGGTTCAGGAAGGAGCCCAG          |
| isoform_2   | AACGTACAGGACCCAGAAACCCAGCAGAATCTTTGCAGGCTGGTTCAGGAAGGAGCCCAG          |
| isoform_1   | AACGTACAGGACCCAGAAACCCAGCAGAATCTTTGCAGGCTGGTTCAGGAAGGAGCCCAG          |
|             | *****                                                                 |

|             |                                                               |
|-------------|---------------------------------------------------------------|
| E1_FLAG-mA3 | GTGGCTGCCATGGACCTATACGAATTTAAAAAGTGTGGGAAGAAGTTTGTGGACAATGGT  |
| isoform_2   | GTGGCTGCCATGGACCTATACGAATTTAAAAAGTGTGGGAAGAAGTTTGTGGACAATGGT  |
| isoform_1   | GTGGCTGCCATGGACCTATACGAATTTAAAAAGTGTGGGAAGAAGTTTGTGGACAATGGT  |
|             | *****                                                         |
| E1_FLAG-mA3 | GGCAGGCGATTTCAGGCCTTGGAAAAGACTGCTTACAAATTTTAGATACCAGGATTCTAAG |
| isoform_2   | GGCAGGCGATTTCAGGCCTTGGAAAAGACTGCTTACAAATTTTAGATACCAGGATTCTAAG |
| isoform_1   | GGCAGGCGATTTCAGGCCTTGGAAAAGACTGCTTACAAATTTTAGATACCAGGATTCTAAG |
|             | *****                                                         |
| E1_FLAG-mA3 | CTTCAGGAGATTCTGAG-----                                        |
| isoform_2   | CTTCAGGAGATTCTGAG-----                                        |
| isoform_1   | CTTCAGGAGATTCTGAGACCTTGCTACATCTCGGTCCCTTCCAGCTCTTCATCCACTCTG  |
|             | *****                                                         |
| E1_FLAG-mA3 | -----GCGA                                                     |
| isoform_2   | -----GCGA                                                     |
| isoform_1   | TCAAATATCTGTCTAACAAAAGGTCTCCCAGAGACGAGGTTCTGGGTGGAGGGCAGGCGA  |
|             | ****                                                          |
| E1_FLAG-mA3 | ATGGACCCGCTAAGTGAAGAGGAATTTTACTCGCAGTTTTTACAACCAACGAGTCAAGCAT |
| isoform_2   | ATGGACCCGCTAAGTGAAGAGGAATTTTACTCGCAGTTTTTACAACCAACGAGTCAAGCAT |
| isoform_1   | ATGGACCCGCTAAGTGAAGAGGAATTTTACTCGCAGTTTTTACAACCAACGAGTCAAGCAT |
|             | *****                                                         |
| E1_FLAG-mA3 | CTCTGCTACTACCACCGCATGAAGCCCTATCTATGCTACCAGCTGGAGCAGTTCAATGGC  |
| isoform_2   | CTCTGCTACTACCACCGCATGAAGCCCTATCTATGCTACCAGCTGGAGCAGTTCAATGGC  |
| isoform_1   | CTCTGCTACTACCACCGCATGAAGCCCTATCTATGCTACCAGCTGGAGCAGTTCAATGGC  |
|             | *****                                                         |
| E1_FLAG-mA3 | CAAGCGCCACTCAAAGGCTGCCTGCTAAGCGAGAAAAGGCAAACAGCATGCAGAAATCCTC |
| isoform_2   | CAAGCGCCACTCAAAGGCTGCCTGCTAAGCGAGAAAAGGCAAACAGCATGCAGAAATCCTC |
| isoform_1   | CAAGCGCCACTCAAAGGCTGCCTGCTAAGCGAGAAAAGGCAAACAGCATGCAGAAATCCTC |
|             | *****                                                         |
| E1_FLAG-mA3 | TTCCTTGATAAGATTTCGGTCCATGGAGCTGAGCCAAGTGACAATCACCTGCTACCTCACC |
| isoform_2   | TTCCTTGATAAGATTTCGGTCCATGGAGCTGAGCCAAGTGACAATCACCTGCTACCTCACC |
| isoform_1   | TTCCTTGATAAGATTTCGGTCCATGGAGCTGAGCCAAGTGACAATCACCTGCTACCTCACC |
|             | *****                                                         |

|             |                                                               |
|-------------|---------------------------------------------------------------|
| E1_FLAG-mA3 | TGGAGCCCCTGCCCCAACTGTGCCTGGCAACTGGCGGCATTCAAAAAGGGATCGTCCAGAT |
| isoform_2   | TGGAGCCCCTGCCCCAACTGTGCCTGGCAACTGGCGGCATTCAAAAAGGGATCGTCCAGAT |
| isoform_1   | TGGAGCCCCTGCCCCAACTGTGCCTGGCAACTGGCGGCATTCAAAAAGGGATCGTCCAGAT |
|             | *****                                                         |
| E1_FLAG-mA3 | CTAATTCTGCATATCTACACCTCCCGCCTGTATTTCCACTGGAAGAGGCCCTTCCAGAAG  |
| isoform_2   | CTAATTCTGCATATCTACACCTCCCGCCTGTATTTCCACTGGAAGAGGCCCTTCCAGAAG  |
| isoform_1   | CTAATTCTGCATATCTACACCTCCCGCCTGTATTTCCACTGGAAGAGGCCCTTCCAGAAG  |
|             | *****                                                         |
| E1_FLAG-mA3 | GGGCTGTGTTCTCTGTGGCAATCAGGGATCCTGGTGGACGTCATGGACCTCCCACAGTTT  |
| isoform_2   | GGGCTGTGTTCTCTGTGGCAATCAGGGATCCTGGTGGACGTCATGGACCTCCCACAGTTT  |
| isoform_1   | GGGCTGTGTTCTCTGTGGCAATCAGGGATCCTGGTGGACGTCATGGACCTCCCACAGTTT  |
|             | *****                                                         |
| E1_FLAG-mA3 | ACTGACTGCTGGACAACTTTGTGAACCCGAAAAGGCCGTTTTGGCCATGGAAAGGATTG   |
| isoform_2   | ACTGACTGCTGGACAACTTTGTGAACCCGAAAAGGCCGTTTTGGCCATGGAAAGGATTG   |
| isoform_1   | ACTGACTGCTGGACAACTTTGTGAACCCGAAAAGGCCGTTTTGGCCATGGAAAGGATTG   |
|             | *****                                                         |
| E1_FLAG-mA3 | GAGATAATCAGCAGGCGCACACAAAGGCGGCTCCGCAGGATCAAGGAGTCCTGGGGTCTG  |
| isoform_2   | GAGATAATCAGCAGGCGCACACAAAGGCGGCTCCGCAGGATCAAGGAGTCCTGGGGTCTG  |
| isoform_1   | GAGATAATCAGCAGGCGCACACAAAGGCGGCTCCGCAGGATCAAGGAGTCCTGGGGTCTG  |
|             | *****                                                         |
| E1_FLAG-mA3 | CAAGATTTGGTGAATGACTTTGGAAACCTACAGCTTGGACCCCCGATGTCTTGA        |
| isoform_2   | CAAGATTTGGTGAATGACTTTGGAAACCTACAGCTTGGACCCCCGATGTCTTGA        |
| isoform_1   | CAAGATTTGGTGAATGACTTTGGAAACCTACAGCTTGGACCCCCGATGTCTTGA        |
|             | *****                                                         |

**Figure S5. Sequence analysis of the entire coding region of *Apobec3* cDNA cloned from E1 spleen cells.**

Spleen cell mRNA was prepared from E1 mouse, reverse transcribed as described for Figure S2, and the *Apobec3* cDNA was amplified by using primers specific for 5' and 3' UTRs of the FLAG-tagged mA3 allele (5'-CAGAAAATGCAACCCCAGCGC-3' and 5'-CATGCACAACTTAATCTTGTCTTTC-3', respectively) and Pfu Turbo DNA Polymerase (Agilent Technologies, Santa Clara, California, U.S.A.). The amplified fragment was cloned into pCR-Blunt II-TOPO plasmid using the Zero Blunt TOPO PCR Cloning Kit (Invitrogen, Thermo Fisher Scientific) and sequenced as described [9]. The resultant DNA sequence was aligned with the consensus isoform 1 (NCBI Reference Sequence: NM\_001160415.1) and isoform 2 (NCBI Reference Sequence: NM\_030255.3) sequences using the Clustal W (<https://www.genome.jp/tools-bin/clustalw>).
