# Supplementary material for: Distinctive High Expression of Antiretroviral APOBEC3 Protein in Mouse Germinal Center B Cells
Source: MDPI journal article supplement (doi:10.3390/v14040832), 2022-04-17
Supplement: s1 [file s1]

AcctgctgctggctgattcggagccatcaatgatccatTTTTgtgctccccgttgatctcagctcagctccacacctggggcagtt  
 gggaaattagaggtgaagggtgccaaaatccaagccacaattagaaatgcgaagccaggtgtccctccctcctaagccg  
 aaggagaaaaatgaagggtccccactccttaacacctacagagtc aaaccttggttcaactggcagctttggctgcaagct  
 cggcacaggatggtctaggcaggttgatggagagcctggggccacccttggggcgtctgtcctaccctaccgcggctcggc  
 atcagettctctaccatcagttagtttccctttctctttgcatccccgcgggcgtgtacagaggagcaggtctctgccaag  
 ccaagggacaaagaggtgggcaggagccttctgggcttgatgcctagagccctccattccgggagctgatgcaggaagA  
 AAGGTGGGGCCTGCATTCACTTGGCCCCGGGAGGTCAGTTTCACTTCTGGGGGTCTT  
 CCATAGCCTGCTCACAGAAAAATGCAACCCAGCGCCTGGGGCCCAGAGCTGGGAT  
 GGACTACAAAGACGATGACGACAAGGGACCATTCTGTCTGGGATGCAGCCATCGC  
 AAATGCTATTACCGATCAGgtaccgctggccccgtcctccaaaattttcactgcagctcttctggtgcccc  
 attttctgtataccgagcctctctctaggtccccagctcccgattctctctcacattctccaggatactccgtagctccactcc  
 cctegagggtccttgttctgagccgttcggttacettatagctgcttctaaactggccaccctgtaccctctccacgtcacccat  
 atttcttctgttgagacttctcagttctgggttactgcctttgggtcttcatgctgatccagggttaggctggtctgggttcaa  
 attttaagagaaatccatggaagcagactttggacgaccatgtatggagaactttcgatagatgtcctagaatatccgtgct  
 gttttaaccaacctcaggggatactgggagaagaggggaccactctctaaggcaatgtgaaccacctttccagaagtagcc  
 actctgagctgggaaa

**Figure S1. Genomic sequence around exon 1 of the *Apobec3* gene.** Exon 1 including the UTR (italicized) and the wild-type CDS (bold) is highlighted with yellow background color, inserted FLAG sequence is shown in red, the CRISPR target sequences are boxed, and ssODN sequence underlined.
